# Supplementary material for: Quality of medical products for diabetes management: a systematic review
Source: PubMed Central journal article supplement (PMC6768360; doi:10.1136/bmjgh-2019-001636), 2019-09-24
Supplement: bmjgh-2019-001636supp003.pdf [file bmjgh-2019-001636supp003.pdf]

## Appendix 3. Characteristics of prevalence surveys and equivalence studies of antidiabetic medicines

| Reference                 | Active pharmaceutical ingredient (API) | Brand name                                                                                                                                                                                                                                                                                                                                              | Outlet                                    | Reference standard used                         | Test performed and analytical technique used                                                                                                                                                                                 | Total number of samples collected | Failed samples n (%) |
|---------------------------|----------------------------------------|---------------------------------------------------------------------------------------------------------------------------------------------------------------------------------------------------------------------------------------------------------------------------------------------------------------------------------------------------------|-------------------------------------------|-------------------------------------------------|------------------------------------------------------------------------------------------------------------------------------------------------------------------------------------------------------------------------------|-----------------------------------|----------------------|
| <b>Prevalence surveys</b> |                                        |                                                                                                                                                                                                                                                                                                                                                         |                                           |                                                 |                                                                                                                                                                                                                              |                                   |                      |
| Blume, 1993 [39]          | Glibenclamide                          | Daonil, Diabemin, Euglucon, Pira, Glimel, Dia-Eptal, Gewaglucon, Glibenclamid, Glucobene, Normoglucon, Semi-Euglucon, Glyburide, Albert Glyberide, Diabeta, Glibenklamidum Betanas, Maninil 5, Hexaglucon, Gilemid, Azuglucon, Bastiverit, Diabasan, Duraglucon N, Euglucon, Gliben-Puren N, Glibenclamid 3.5 GDS, Glibenclamid 3.5 Riker, Glibenclamid | Retail pharmacy, wholesaler, manufacturer | British Pharmacopeia (BP) and European standard | Active pharmaceutical ingredients (API) identity test, purity test, API content assay, uniformity of content test<br><br>Thin-layer chromatography (TLC), spectrophotometry or high performance liquid chromatography (HPLC) | 187                               | 8 (4.3%)             |

| Reference                                              | Active pharmaceutical ingredient (API) | Brand name                                                                                                                                                                                                                                     | Outlet                | Reference standard used | Test performed and analytical technique used                                                                                                                      | Total number of samples collected | Failed samples n (%) |
|--------------------------------------------------------|----------------------------------------|------------------------------------------------------------------------------------------------------------------------------------------------------------------------------------------------------------------------------------------------|-----------------------|-------------------------|-------------------------------------------------------------------------------------------------------------------------------------------------------------------|-----------------------------------|----------------------|
|                                                        |                                        | ratiopharm, Glimidstada, Gluconorm, Gluco-Tablinen, Glukoreduct, Glukovital 3.5, Glycolande N, Orabetic, Praeciglucon, Derocetyl, Euglykon, Euglucon 5, Glibenhexal, Glibenclamidum, Hemi-Daonil, Norglicem 5, Gliben, Micronase, some unknown |                       |                         |                                                                                                                                                                   |                                   |                      |
| Westenberger, 2005 [40]                                | Metformin                              | Unknown                                                                                                                                                                                                                                        | Ordered from websites | US Pharmacopeia (USP)   | Dissolution test, weight uniformity, API content assay and purity<br><br>HPLC, near infrared spectroscopy (NIR), NIR imaging and thermogravimetric analysis (TGA) | 4                                 | 0 (0.0%)             |
| Central Drugs Standard Control Organisation, 2009 [41] | Metformin, gliclazide, glimepiride     | Glyciphage, Glycomet, Gluformin, Glizide-80, Glycigon, Reclide, Glimiprex 2, Amaryl 2, Glyree-2                                                                                                                                                | Pharmacy <sup>a</sup> | Manufacturer standard   | API identification and content assay                                                                                                                              | 45                                | 0 (0.0%)             |

| Reference                  | Active pharmaceutical ingredient (API) | Brand name                                                                                                                                                                                                                                                                                | Outlet                                                          | Reference standard used                              | Test performed and analytical technique used                                                       | Total number of samples collected | Failed samples n (%) |
|----------------------------|----------------------------------------|-------------------------------------------------------------------------------------------------------------------------------------------------------------------------------------------------------------------------------------------------------------------------------------------|-----------------------------------------------------------------|------------------------------------------------------|----------------------------------------------------------------------------------------------------|-----------------------------------|----------------------|
| Ebenezer, 2015 [42]        | Metformin                              | Glucophage, some unknown                                                                                                                                                                                                                                                                  | Pharmacy and open market trader                                 | BP                                                   | API identification and content assay<br><br>Near-infrared (NIR) spectroscopy, HPLC                 | 179                               | 7 (3.9%)             |
| Islam, 2017 [43]           | Metformin, glibenclamide               | Unknown                                                                                                                                                                                                                                                                                   | Pharmacy, Depot-A, Depot-B, wholesalers (licensed) <sup>b</sup> | BP and USP                                           | Dissolution test, content uniformity, API content assay<br><br>HPLC                                | 112                               | 21 (18.8%)*          |
| <b>Equivalence studies</b> |                                        |                                                                                                                                                                                                                                                                                           |                                                                 |                                                      |                                                                                                    |                                   |                      |
| Attorese, 2007 [44]        | Glimepiride                            | Adiamyl, Amadiab-2, Bioglic, Diagril, Diabold, Diamepid, Dolcyl, Evopride, Hanall glimepiride, Geliemeiniaio Jiaonang, GLA-DM, Glimepibal, Glimax, Glimepiride (Boryung), Glimepiride (Hanni), Gimepirida, Glimepirida (Esterlina), Glimepirida (Eurofarma), Glimulin-2, Glusafe, Metrix, | Unknown                                                         | Manufacturer specification of innovator brand Amaryl | API content assay, impurities, residual solvents, dissolution test<br><br>HPLC, gas chromatography | 23                                | 13 (56.5%)           |

| Reference                 | Active pharmaceutical ingredient (API) | Brand name                                             | Outlet                                       | Reference standard used | Test performed and analytical technique used                                                                                                                                             | Total number of samples collected | Failed samples n (%) |
|---------------------------|----------------------------------------|--------------------------------------------------------|----------------------------------------------|-------------------------|------------------------------------------------------------------------------------------------------------------------------------------------------------------------------------------|-----------------------------------|----------------------|
|                           |                                        | Panabutol, Taboss                                      |                                              |                         |                                                                                                                                                                                          |                                   |                      |
| Hamdan, 2010 [45]         | Metformin                              | Glucophage, Glymet, Metforal, Diaphage, Formit         | Unknown                                      | BP                      | Dissolution test, API content identification and assay<br><br>UV-spectrophotometer, Fourier-transform infrared (FTIR) spectroscopy                                                       | 5                                 | 1 (20.0%)            |
| Chandrasekaran, 2011 [46] | Metformin                              | Unknown                                                | Unknown                                      | Not specified           | Dissolution test<br><br>UV-visible spectrophotometry                                                                                                                                     | 5                                 | 0 (0.0%)             |
| Afifi, 2012 [47]          | Metformin                              | Glucophage, Formit, Glucare, Dialon, Metaphage, Metfor | Pharmacy <sup>a</sup>                        | USP                     | API content assay, dissolution test, disintegration test, weight uniformity, hardness test, friability test                                                                              | 6                                 | 0 (0.0%)             |
| Chatur, 2012 [48]         | Voglibose                              | Voglitor MD, Vobit MD, Prandial, Obligo MD             | Pharmacy <sup>a</sup>                        | Not specified           | Weight uniformity, hardness test, friability test, disintegration test, content uniformity, wetting time and water absorption, USP in-vitro dissolution test<br><br>UV-spectrophotometry | 5                                 | 1 (20.0%)            |
| Olusola, 2012 [49]        | Metformin                              | Unknown                                                | Registered pharmacy                          | BP                      | Disintegration test, weight uniformity, hardness test, friability test, BP 2007 content assay<br><br>UV-visible spectrophotometry                                                        | 8                                 | 1 (12.5%)            |
| Oyetunde, 2012 [50]       | Metformin                              | Glucophage, some unknown                               | Country representative seller and wholesaler | BP                      | API content, dissolution test<br><br>UV-visible spectrophotometer                                                                                                                        | 5                                 | 2 (40.0%)            |

| Reference            | Active pharmaceutical ingredient (API) | Brand name                                                                                         | Outlet                | Reference standard used                    | Test performed and analytical technique used                                                                                                                                | Total number of samples collected | Failed samples n (%) |
|----------------------|----------------------------------------|----------------------------------------------------------------------------------------------------|-----------------------|--------------------------------------------|-----------------------------------------------------------------------------------------------------------------------------------------------------------------------------|-----------------------------------|----------------------|
| El-Sabawi, 2013 [51] | Glibenclamide                          | Daonil, Melix, Glunil, Glibil, Glibemide, Glucomid, Glucophage, Glymet, Metforal, Diaphage, Formit | Community pharmacy    | BP and USP                                 | API content assay, impurities, friability test, dissolution test<br>HPLC, TLC                                                                                               | 6                                 | 2 (33.3%)            |
| Labu, 2013 [52]      | Metformin                              | Unknown                                                                                            | Pharmacy <sup>a</sup> | BP and USP                                 | Dissolution test, disintegration test, weight uniformity, hardness test, friability test, thickness test, API content assay<br><br>Titrimetry, UV-visible spectrophotometer | 7                                 | 0 (0.0%)             |
| Ajala, 2014 [53]     | Metformin                              | Unknown                                                                                            | Community pharmacy    | BP and USP                                 | Weight uniformity, crushing strength, friability, disintegration, dissolution, API content assay                                                                            | 8                                 | 3 (37.5%)            |
| Betari, 2014 [54]    | Sitagliptin                            | Unknown                                                                                            | Unknown               | USP and Food and Drug Administration (FDA) | Weight uniformity, hardness test, friability test, content uniformity, dissolution test<br><br>UV-visible spectrophotometry, UV spectrophotometry                           | 5                                 | 0 (0.00%)            |
| Elango, 2014 [55]    | Metformin                              | Unknown                                                                                            | Pharmacy <sup>a</sup> | Not specified                              | Physical inspection (including size and weight), purity test, friability test, API content assay, dissolution test<br><br>UV-spectrophotometry                              | 15                                | 3 (20.0%)            |
| Elhamili, 2014 [56]  | Glibenclamide                          | Gliboral, Glynase, Glib-5                                                                          | Private pharmacy      | BP                                         | Dissolution test, disintegration test, friability test, identification and API content assay                                                                                | 3                                 | 0 (0.0%)             |

| Reference              | Active pharmaceutical ingredient (API) | Brand name                                | Outlet                                       | Reference standard used | Test performed and analytical technique used                                                                                                                                                            | Total number of samples collected | Failed samples n (%) |
|------------------------|----------------------------------------|-------------------------------------------|----------------------------------------------|-------------------------|---------------------------------------------------------------------------------------------------------------------------------------------------------------------------------------------------------|-----------------------------------|----------------------|
|                        |                                        |                                           |                                              |                         | HPLC-UV, infrared (IR) spectroscopy                                                                                                                                                                     |                                   |                      |
| Abdulhameed, 2016 [57] | Metformin                              | Unknown                                   | Manufacturing company                        | USP                     | API content assay, friability test, dissolution test<br><br>UV-visible spectrophotometry                                                                                                                | 5                                 | 0 (0.0%)             |
| Gupta, 2016 [58]       | Metformin                              | Unknown                                   | Hospital pharmacy and local private pharmacy | USP                     | Weight uniformity, friability test, disintegration test, dissolution test, API content assay<br><br>UV-visible spectrophotometry                                                                        | 4                                 | 0 (0.0%)             |
| Sachan, 2016 [59]      | Meftormin                              | Melmet, Obimet, Glycomet, Glyciphage      | Unknown                                      | Indian Pharmacopeia     | Visual inspection, uniformity mass test, hardness test, friability test, disintegration test, API content assay, dissolution test<br><br>UV spectrophotometry, UV-visible double beam spectrophotometry | 4                                 | 0 (0.0%)             |
| Sakr, 2016 [60]        | Glibenclamide                          | Glymide, Doabetic, Glibil, Daonil,        | Community pharmacy                           | BP and USP              | Dissolution test, weight uniformity, friability test, content uniformity, disintegration time<br><br>HPLC, TLC                                                                                          | 8                                 | 0 (0.0%)             |
| Alam, 2017 [61]        | Glibenclamide                          | Daonil, Glibil, Doabetic, Diatab, Glymide | Retail pharmacy                              | USP                     | Friability test, hardness test, weight uniformity, disintegration test, content uniformity<br><br>UV-spectrophotometry, UV-visible spectrophotometry                                                    | 5                                 | 0 (0.0%)             |
| Eraga, 2017 [62]       | Metformin                              | Unknown                                   | Pharmacy <sup>a</sup>                        | BP                      | Hardness test, friability test, in vitro drug release, dissolution test, API                                                                                                                            | 10                                | 8 (80.0%)**          |

| Reference          | Active pharmaceutical ingredient (API) | Brand name | Outlet                                      | Reference standard used | Test performed and analytical technique used                                                                                              | Total number of samples collected | Failed samples n (%) |
|--------------------|----------------------------------------|------------|---------------------------------------------|-------------------------|-------------------------------------------------------------------------------------------------------------------------------------------|-----------------------------------|----------------------|
|                    |                                        |            |                                             |                         | content assay, weight uniformity, disintegration test<br><br>UV-spectrophotometry, reverse phase (RP)-HPLC                                |                                   |                      |
| Aivalli, 2018 [63] | Metformin, glibenclamide               | Unknown    | District hospital, private pharmacy, market | Not specified           | API identification test, API content assay, uniformity of content test , weight uniformity, dissolution test<br><br>HPLC, IR spectroscopy | 10                                | 0 (0.0%)             |

Note:

If unspecified, this means that in the source document the details (e.g. size, public/private, registered/not) on the pharmacies sampled were not described.

\*In Islam 2017,[44] only the number of medicine failing each quality test was mentioned. Since one medicine may fail more than one test, the failure rate was recorded as the highest possible number of samples failing one of the tests.

\*\*In Eraga 2017,[62] uniformity of content was assessed using two methods i.e. UV spectrophotometry and reverse-phase high performance liquid chromatography. There are several discrepancies in the results of these two tests. Therefore, if samples failed either, they will be categorised as failed samples.

<sup>a</sup>The type of pharmacy (private or public) was not specified.

<sup>b</sup>Depot-A: “a site having a pharmacist with at least three years’ pharmacy training”, Depot-B: “ a site having a doctor or retired nurse in attendance.”
