# Supplementary material for: Quality of medical products for diabetes management: a systematic review
Source: PubMed Central journal article supplement (PMC6768360; doi:10.1136/bmjgh-2019-001636), 2019-09-24
Supplement: bmjgh-2019-001636supp005.pdf [file bmjgh-2019-001636supp005.pdf]

### Appendix 5. Prevalence surveys concordance with MEDQUARG items checklist

| No                | Item                                            | Blume, 1993 | CDSCO, 2009 | Westenberger, 2014 | Ebenezer, 2015 | Islam, 2017 |
|-------------------|-------------------------------------------------|-------------|-------------|--------------------|----------------|-------------|
| 1                 | Title/abstract/keywords                         | N           | N           | Y                  | Y              | N           |
| 2                 | Introduction                                    | N           | Y           | N                  | Y              | Y           |
| <b>Methods</b>    |                                                 |             |             |                    |                |             |
| 3                 | Survey details                                  | N           | N           | N                  | Y              | N           |
| 4                 | Definitions                                     | N           | N           | N                  | Y              | N           |
| 5                 | Outlets                                         | N           | N           | N                  | N              | N           |
| 6                 | Sampling design                                 | N           | Y           | N                  | Y              | N           |
| 7                 | Samplers                                        | N           | Y           | N                  | Y              | N           |
| 8                 | Statistical methods                             | N           | N           | N                  | Y              | Y           |
| 9                 | Ethical issues                                  | N           | N           | N                  | Y              | N           |
| 10                | Packaging                                       | N           | Y           | Y                  | Y              | Y           |
| 11                | Chemical analysis                               | Y           | N           | Y                  | Y              | N           |
| 12                | Method validation                               | N           | N           | N                  | Y              | N           |
| 13                | Blinding                                        | N           | N           | N                  | Y              | N           |
| <b>Results</b>    |                                                 |             |             |                    |                |             |
| 14                | Outlets                                         | N           | Y           | N                  | Y              | Y           |
| 15                | Missing samples                                 | N           | N           | N                  | Y              | N           |
| 16                | Packaging and chemistry results                 | N           | Y           | Y                  | Y              | N           |
| 17                | Category of poor-quality medicine               | N           | N           | N                  | Y              | N           |
| 18                | State company and address as given on packaging | N           | Y           | N                  | Y              | N           |
| 19                | Sharing data with MRA                           | N           | Y           | N                  | N              | Y           |
| 20                | Dissemination                                   | N           | Y           | N                  | N              | N           |
| <b>Discussion</b> |                                                 |             |             |                    |                |             |

| No                       | Item                 | Blume, 1993 | CDSCO, 2009 | Westenberger, 2014 | Ebenezer, 2015 | Islam, 2017 |
|--------------------------|----------------------|-------------|-------------|--------------------|----------------|-------------|
| 21                       | Key results          | Y           | Y           | Y                  | Y              | Y           |
| 22                       | Limitations          | N           | N           | N                  | Y              | Y           |
| 23                       | Interpretation       | Y           | Y           | N                  | Y              | Y           |
| 24                       | Intervention         | Y           | N           | N                  | Y              | Y           |
| <b>Other Information</b> |                      |             |             |                    |                |             |
| 25                       | Conflict of interest | N           | N           | N                  | N              | N           |
| 26                       | Funding              | N           | N           | N                  | N              | N           |
|                          | Total score          | 4           | 11          | 5                  | 21             | 9           |
|                          |                      | 15.4%       | 42.3%       | 19.2%              | 80.8%          | 34.6%       |

Y : Yes, N : No
