# Supplementary material for: Quality of medical products for diabetes management: a systematic review
Source: PubMed Central journal article supplement (PMC6768360; doi:10.1136/bmjgh-2019-001636), 2019-09-24
Supplement: bmjgh-2019-001636supp006.pdf [file bmjgh-2019-001636supp006.pdf]

### Appendix 6. Other types of articles discussing antidiabetic medicine quality

| No | Title                                                                                                                       | First author                           | Year    |
|----|-----------------------------------------------------------------------------------------------------------------------------|----------------------------------------|---------|
| 1  | Lessons from Nigeria: the fight against counterfeit drugs in Africa [1]                                                     | Akunyili, D                            | 2006    |
| 2  | Medicines Quality Database [2]                                                                                              | United States Pharmacopeial Convention | 2008    |
| 3  | Is the drugstore safe? Counterfeit diabetes products on the shelves [3]                                                     | Cheng, MM                              | 2009    |
| 4  | The dangerous world of counterfeit prescription drugs [4]                                                                   | Toscano, P                             | 2011    |
| 5  | FDA alerts companies to stop illegal sale of treatments for diabetes [5]                                                    | US Food and Drug Administration        | 2013    |
| 6  | Counterfeit diabetes products and the ethical question of access [6]                                                        | Cheng, MM                              | 2015    |
| 7  | Media reports on medicine quality: Focusing on USAID-assisted Countries [7]                                                 | McGinnis, M                            | 2015    |
| 8  | Illegally sold diabetes treatments [8]                                                                                      | US Food and Drug Administration        | 2016    |
| 9  | Beware of illegally marketed diabetes treatments [9]                                                                        | US Food and Drug Administration        | 2016    |
| 10 | International SOS warns travellers on World Diabetes Day: Pack your own medication and watch out for counterfeit drugs [10] | International SOS                      | Unknown |
| 11 | Counterfeit diabetes treatments show up all over the globe [11]                                                             | Partnership for Safe Medicines         | Unknown |

#### References

1. Akunyili D. Lessons from Nigeria: the fight against counterfeit drugs in Africa. *Diabetes Soc.* 2006;51(3):41-43.
2. United States Pharmacopeial Convention. *Medicines Quality Database*. Available from: <http://apps.usp.org/app/worldwide/medQualityDatabase/reportResults.html?country=Ethiopia%2BGhana%2BKenya%2BMozambique%2BNigeria%2BCambodia%2BLao+PDR%2BPhilippines%2BThailand%2BViet+Nam%2BBolivia%2BColombia%2BEcuador%2BGuatemala%2BGuyana%2BPeru&period=2017> [Accessed 17 December 2018].
3. Cheng MM. Is the drugstore safe? Counterfeit diabetes products on the shelves. *Journal of Diabetes Science and Technology.* 2009;3(6):1516–20.

4. Toscano P. *The dangerous world of counterfeit prescription drugs*. Available from: <http://usatoday30.usatoday.com/money/industries/health/drugs/story/2011?10?09/cnbc?drugs/50690880/1> [Accessed 16 June 2016].
5. US Food and Drug Administration. FDA alerts companies to stop illegal sale of treatments for diabetes. Available from: <http://www.fda.gov/ForConsumers/ProtectYourself/HealthFraud/ucm352276.htm>. [Accessed 16 June 2016].
6. Cheng MM, Gedeon C. Counterfeit diabetes products and the ethical question of access. *Diabetes Manag*. 2015;5(5):341–7.
7. McGinnis M. *Media reports on medicine quality: Focusing on USAID-assisted countries by the promoting the quality of medicines program*. Available from: [https://www.usp.org/sites/default/files/usp\\_pdf/EN/PQM/june2015-pqm-media-reports.pdf](https://www.usp.org/sites/default/files/usp_pdf/EN/PQM/june2015-pqm-media-reports.pdf) [Accessed 1 May 2016].
8. US Food and Drug Administration. *Illegally sold diabetes treatment*. Available from: <http://www.fda.gov/ForConsumers/ProtectYourself/HealthFraud/ucm352276.htm> [Accessed 16 June 2016].
9. US Food and Drug Administration. *Beware of illegally marketed diabetes treatments*. Available from: <http://www.fda.gov/ForConsumers/ConsumerUpdates/ucm361487.htm> [Accessed 16 June 2016].
10. International SOS. *International SOS warns travellers on World Diabetes Day: Pack your own medication and watch out for counterfeit drugs*. Available from: <https://www.internationalsos.com/clinicsinchina/en/872.aspx> [Accessed 16 June 2016].
11. SafeMedicines. *Counterfeit diabetes treatments show up all over the globe*. Available from: <http://www.safemedicines.org/counterfeit-diabetes-treatments-show-up-all-over-the-globe> [Accessed 16 June 2016].
